# Supplementary material
Source: publisher figshare collection journal article supplement (https://acs.figshare.com/ndownloader/files/21975336)
Supplement: Supplementary file 1 [file 21975336]

**ACS Sustainable Chemistry & Engineering**  
**Supporting Information for:**  
**Aluminum Decoration on MoS<sub>2</sub> Ultrathin Nanosheets for**  
**Highly Efficient Hydrogen Evolution**

Jiahuang Jian<sup>1</sup>, Yang Li<sup>1</sup>, Hai Bi<sup>1, 2</sup>, Xinzhu Wang<sup>1</sup>, Xiaohong Wu<sup>1\*</sup>, Wei Qin<sup>3</sup>

1 MIIT Key Laboratory of Critical Material Technology for New Energy Conversion and Storage, School of Chemistry and Chemical Engineering, Harbin Institute of Technology, Harbin, 150001, P.R. China

2 School of Engineering and Applied Sciences, Harvard University, 9 Oxford Street, Cambridge, Massachusetts 02138, USA

3 School of Materials Science and Engineering, Harbin Institute of Technology, Harbin, Heilongjiang. 150001, P.R. China

\*Corresponding author. E-mail address: wuxiaohong@hit.edu.cn (Xiaohong Wu)

Number of Pages: 7

Number of Figures: 5

Number of Tables: 4

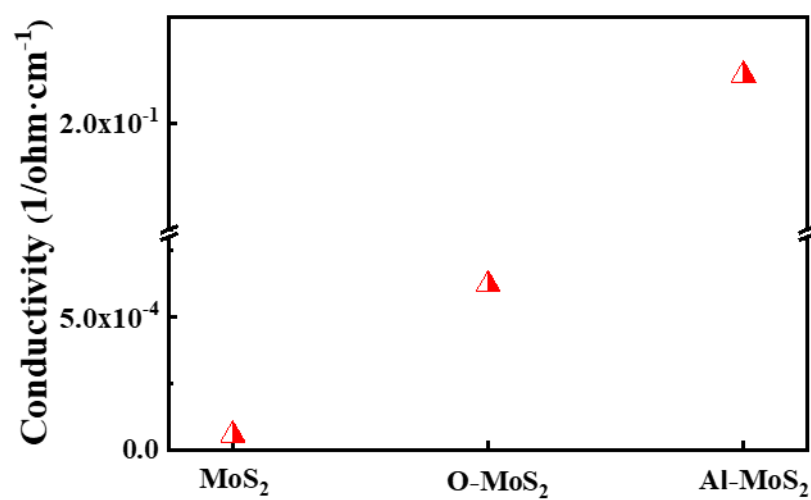

**Figure S1:** Hall conductivity of  $\text{MoS}_2$ ,  $\text{O-MoS}_2$  and  $\text{Al-MoS}_2$ .

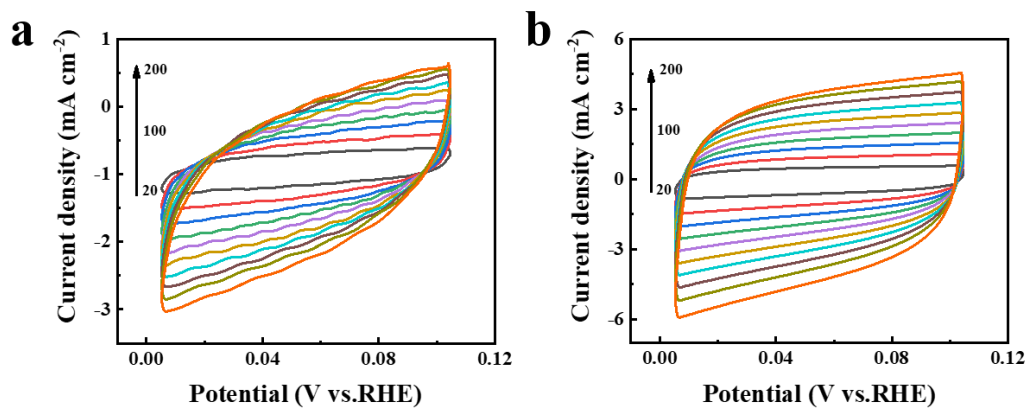

**Figure S2:** Cyclic Voltammetry curves for (a) O-MoS<sub>2</sub> and (b) Al-MoS<sub>2</sub> at different scan rates (20, 40, 60, 80, 100, 120, 140, 160, 180, 200 mV s<sup>-1</sup>) in 0.5 M H<sub>2</sub>SO<sub>4</sub>.

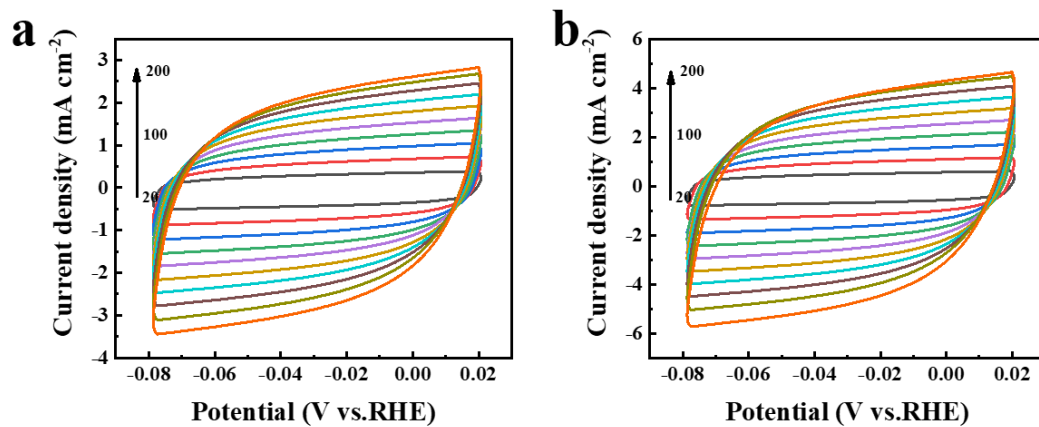

**Figure S3:** Cyclic Voltammetry curves for (a) O-MoS<sub>2</sub> and (b) Al-MoS<sub>2</sub> at different scan rates (20, 40, 60, 80, 100, 120, 140, 160, 180, 200 mV s<sup>-1</sup>) in 1 M KOH.

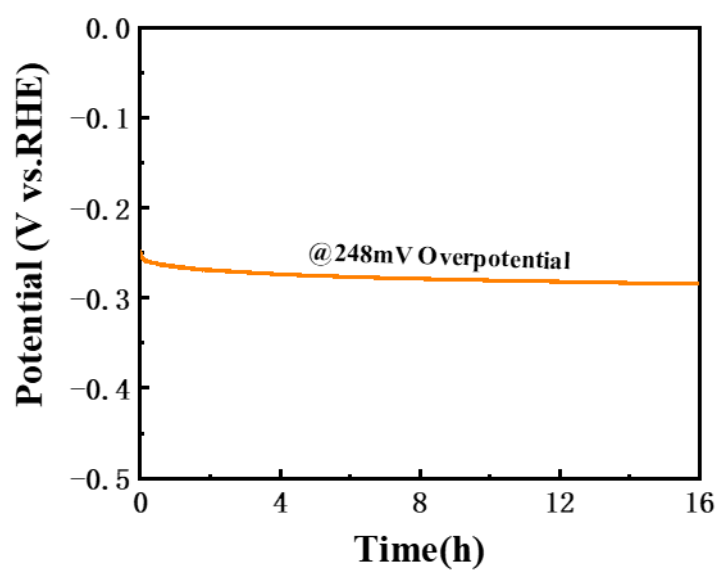

**Figure S4:** Chronoamperometric curve of Al-MoS<sub>2</sub> at an overpotential of 248 mV for 16 h in 0.5 M H<sub>2</sub>SO<sub>4</sub> solution.

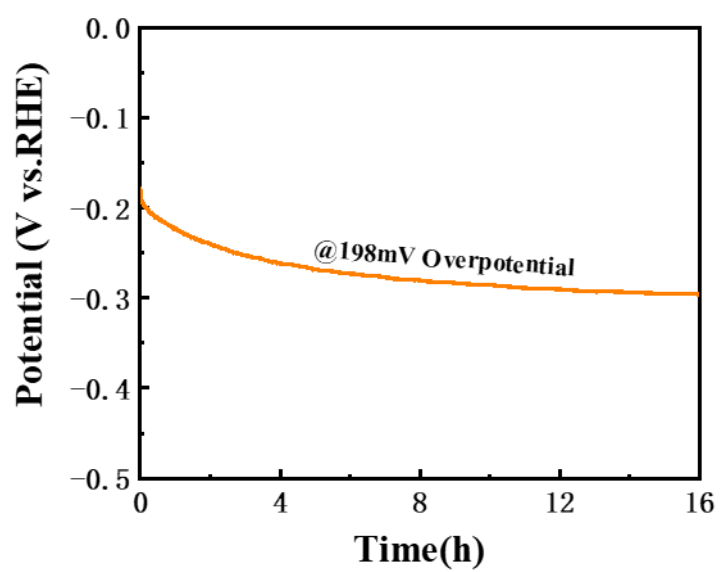

**Figure S5:** Chronoamperometric curve of Al-MoS<sub>2</sub> at an overpotential of 198 mV for 16 h in 1 M KOH solution.

**Table S1.** Nyquist plot fitted data (0.5 M H<sub>2</sub>SO<sub>4</sub>):

| <b>Catalyst</b>     | <b>R<sub>s</sub> (Ω)</b> | <b>R<sub>ct</sub> (Ω)</b> |
|---------------------|--------------------------|---------------------------|
| Al-MoS <sub>2</sub> | 7.4                      | 46.2                      |
| O-MoS <sub>2</sub>  | 7.1                      | 249.6                     |

**Table S2.** Calculated double layer capacitance (C<sub>dl</sub>), electrochemically active Surface area (ECSA) values in 0.5 M H<sub>2</sub>SO<sub>4</sub> solution:

| <b>Catalyst</b>     | <b>C<sub>dl</sub> (mF cm<sup>-2</sup>)</b> | <b>ECSA (cm<sup>2</sup>)</b> |
|---------------------|--------------------------------------------|------------------------------|
| Al-MoS <sub>2</sub> | 19.11                                      | 546                          |
| O-MoS <sub>2</sub>  | 5.12                                       | 146.6                        |

**Table S3.** Nyquist plot fitted data (1 M KOH):

| <b>Catalyst</b>     | <b>R<sub>s</sub> (Ω)</b> | <b>R<sub>ct</sub> (Ω)</b> |
|---------------------|--------------------------|---------------------------|
| Al-MoS <sub>2</sub> | 10.9                     | 44.2                      |
| O-MoS <sub>2</sub>  | 12.2                     | 130.9                     |

**Table S4.** Calculated double layer capacitance (C<sub>dl</sub>), electrochemically active Surface area (ECSA) values in 1 M KOH solution:

| <b>Catalyst</b>     | <b>C<sub>dl</sub> (mF cm<sup>-2</sup>)</b> | <b>ECSA (cm<sup>2</sup>)</b> |
|---------------------|--------------------------------------------|------------------------------|
| Al-MoS <sub>2</sub> | 20.02                                      | 500.5                        |
| O-MoS <sub>2</sub>  | 11.95                                      | 298.8                        |
